# Supplementary material for: The Nature of Lattice Distortion and Strengthening in High Entropy Alloy
Source: Research Square preprint supplement (doi:10.21203/rs.3.rs-123015/v1), 2020-12-28
Supplement: Supplementary file 1 [file f817255e89a64b98d5626947.docx]

**Supplementary Notes**

The Nature of Lattice Distortion and Strengthening in High Entropy Alloy

Y.T. Shao1,2*, H.W. Hsiao1,2*, Q. Yang1,3*, Y. Hu1,2*, P.K. Liaw4 and J.M. Zuo1,2

1Department of Materials Science and Engineering, University of Illinois at Urbana-Champaign, 1304 W Green St, Urbana, IL 61801, United States

2Fredrick Seitz Materials Research Laboratory, University of Illinois at Urbana-Champaign, 104 S Goodwin Ave, Urbana, IL 61801, United States

3 School of Physical Science and Technology, ShanghaiTech University, Shanghai 201210, China

4 Department of Materials Science and Engineering, The University of Tennessee Knoxville, Knoxville, TN 37996, United States

Contents

[1. Al0.1CoCrFeNi: Structure, Phases and Mechanical properties 1](#_Toc57747661)

[2. Chemical Disorder in Al0.1CoCrFeNi 2](#_Toc57747662)

[3. Scanning Electron NanoDiffraction (SEND) and Imaging 3](#_Toc57747663)

[4. Cepstral Analysis of Electron Diffuse Scattering and histogram segmentation 4](#_Toc57747664)

[5. Interaction of Nanoscopic Shear with Dislocations 5](#_Toc57747665)

[Suppl. References 6](#_Toc57747666)

# 1. Al0.1CoCrFeNi: Structure, Phases and Mechanical properties

Al0.1CoCrFeNi belongs to the family of quaternary alloy CoCrFeNi. The addition of Alx (x = 0 to 2)1 with the large Al atomic radius distorts the crystal lattice, and at high concentrations of Al (x>0.5), the structure of AlxCoCrFeNi transitions from FCC to BCC structure1-3. According to X-ray diffraction, Al0.1CoCrFeNi has the single-phase FCC structure in as-cast, as well as homogenized samples1,4.

For the alloy system of AlxCoCrFeNi, the CALPHAD phase diagram calculations predict a single-phase field (FCC) at 1100 ˚C below x = 0.31 and a two-phase field (FCC + B2 or FCC+BCC) between x=0.31 and 1.185,6. The phase diagram calculations further predict that the FCC + BCC/B2 phases solidifies together from liquid even for x = 0.16. However, the total amount of BCC + B2 phases calculated is only 0.2 % or less, which was not experimentally observed before.

The mechanical properties of Al0.1CoCrFeNi compare favorably with these of stainless steel 316L7, with the yield strength and ultimate tensile strength at 160 and 390 MPa8, respectively, for samples after homogenization at 1100˚ C. The Young’s modulus is measured at 203 GPa for both as-cast and processed samples, while the uniform elongation of the as-cast sample is reported at 65%7.

# 2. Chemical Disorder in Al0.1CoCrFeNi

The STEM/EDS technique was employed to determine chemical disorder in Al0.1CoCrFeNi. To avoid zone axis electron channeling effects9,10, we used the off-zone axis orientation (tilted ~6° away from the [001] zone axis) to collect EDS spectra and focused on chemical order at 1 nm apart.

The STEM/EDS area analysis was performed using an electron probe of 0.5 nm in FWHM, with a 90x90 points scan over a sample area of 90x90 nm2 . The sample thickness was determined as 186 nm by CBED. The EDS spectra were acquired using a four-quadrant FEI Super-X detector with the acquisition time of 1s per spectrum. **Extended Data** **Fig. 1a** shows the averaged spectrum from the entire dataset. For the analysis, the K-α peak signal for each element in each X-ray spectrum was first smoothed using the Savitzky-Golay filter, which was then fitted with a Gaussian peak to obtain the peak height. An example of the Cr K-edge fitting data is displayed in **Extended Data** **Fig. 1b**. The peak ratio was then calculated for each element by dividing its peak height by a sum of all K-α peak heights in each spectrum. **Extended Data** **Figs. 1c-g** show the peak ratio maps for each of five elements in Al0.1CoCrFeNi. The mean peak ratios of Al, Cr, Fe, Co, Ni are 0.011, 0.263, 0.252, 0.245, 0.229, respectively. The inset in **Extended Data** **Fig. 1a** also shows the enlarged spectrum around the Ga-K peak, showing that the concentration of Ga caused by FIB is negligibly low in the sample.

Autocorrelation function (ACF) analysis was applied to the EDS peak ratio maps to examine the degree of non-randomness in elemental distributions. The ACF coefficient, ACFexp(*r*), measures the degree of correlation between two pixels at a distance *r* apart in an experimental elemental peak ratio map. To distinguish between a randomly distributed alloy from a non-random alloy, we first constructed the references using the random distribution model. To this end, random number images were generated with a standard deviation (σR) of 0.0048, which is the standard deviation of the Cr EDS peak-ratio map. These random images were then used to calculate ACFsimulation. The range in the calculated ACFsimulation was found to be dependent on the image size. The σACF_simulation in ACFsimulation was obtained from the simulation of 1000 random images. If we use ACFexp(r) > 3σACF_simulation as a criterion for non-randomness, then out of the five elements, non-randomness is detected for Cr at the distance of ~1 nm (**Fig. 1e**).

In addition to ACF, we also calculated the cross-correlation coefficient between different elements. **Extended Data** **Fig. 2** plots the results. The red and black curves indicate the correlation value of two elemental maps without (0 pixel or 0 nm) and with (1-pixel or 1 nm) image shift, respectively, while the red and gray shadow regions indicate the levels as estimated from the random distribution models. These results show a negative correlation between the Cr, Co, Fe, Ni elements without the pixel shift, while the correlation with Al or after 1 pixel (1 nm) shift can be considered as random. Thus, transition metal elements tend to repel each other, but there is no cross-correlation among neighboring pixels. Al is randomly distributed according to the above data.

To estimate the degree of non-randomness in the scanned sample area, we resorted to the following method. First a random image was generated, which had the same standard deviation as the Cr EDS peak-ratio map (σr=0.0048). And then we artificially created some non-randomness by randomly selecting a pair of pixels and assigned the pair with the same new random number. The number of pairs modified is based on the percentage of non-randomness (PNR). We then calculated the ACFs of the modified random images (1000 images) to obtain their mean and standard deviation non-random. These values are plotted as ACF(1 nm) in **Extended Data** **Fig. 3a**, where the error bar marks non-random and 3 non-random. The plot demonstrates that the ACF coefficient of the non-random images increases with the percentage of non-randomness. The red dash lines mark the ACF(1nm) values of the peak-ratio maps of all elements. The intersection with the non-random ACF indicate that the PNR is ~25% for Cr, while ACFs of other elements all exceed 1σ and even reach to 3σ, suggesting that their PNR are 5-15%.

# 3. Scanning Electron Nanodiffraction (SEND) and Imaging

We performed SEND using a high dynamic-range CMOS Ceta camera, where the 2D electron diffraction pattern was recorded over a 2D grid of real space probe positions, resulting the 4D diffraction dataset (4D-DD). Experimental data was acquired using a FEI Themis Z (Thermo Fisher Scientific) operated at 300 keV with 80 pA beam current, 1.1 mrad semi-convergence angle, having a probe size of 1.2 nm in FWHM (full-width at half-maximum). The microscope is equipped with a Schottky field emission gun (FEG). Under the about experimental conditions, the electron probe can be considered as mostly coherent11. The SEND patterns described in the text were acquired using a 100x100 pixel scan over a sample area of 100x100 nm2. Sample drift correction algorithm was applied during the data acquisition.

**Extended Data** **Fig. 4d-f** maps the distribution of scattering by integrating intensities within the marked regions in **Extended Data** **Fig. 4a-c**, which represent the averaged diffraction pattern and two individual diffraction patterns from the collected 4D-DD. The virtual annular dark-field (ADF) in **Extended Data** **Fig. 4d** show inhomogeneity of electron Bragg diffraction across the scanned area, strong diffraction intensity is seen in regions of tens of nm in sizes. The distributions of Type-1 (**Extended Data** **Fig. 4f)** and 2 (**Extended Data** **Fig. 4e**) diffuse scattering are nm-sized regions at different locations. The Type-1 is more extensive than Type-2. The weak Type-2 diffuse scattering can be indexed based on the BCC structure, and thus is associated with nm-sized bcc phase. A minute BCC phase was predicted by thermodynamics calculation6, but not observed previously.

For indexing electron diffraction patterns, **Extended Data** **Fig. 5** shows the structural models and the corresponding [001] diffraction patterns of FCC, BCC, and B2 phases using the Bloch wave method and the lattice parameter of *a* = 3.59 Å. We take the experimental Al0.1CrFeCoNi electron nanodiffraction pattern of **Extended Data** **Fig. 5a** as an example. For an FCC lattice (**Extended Data** **Fig. 5e**), Bragg reflections (*hkl*) of all even index values are obtained along [001], as shown in **Extended Data** **Fig. 5b**. The BCC lattice (**Extended Data** **Fig. 5f**) diffracts with the Bragg reflections of *h*+*k*+*l* = even, according to the extinction rule (**Extended Data** **Fig. 5c**). For a B2 structure (**Extended Data** **Fig. 5g**), which is chemically ordered, there are no forbidden reflections. The diffraction pattern shows additional {110} reflections corresponding to **Extended Data** **Fig. 5c**. The experimental weak {110} reflection intensities (**Extended Data Fig. 5a**) are consistent with a small volume of BCC phase within the FCC matrix.Other weak diffraction spots could not be indexed with the above structure models.

# 4. Cepstral Analysis of Electron Diffuse Scattering and histogram segmentation

Difference Cepstrum ()analysis of electron diffuse scattering is performed using following equation12:

S1

Where is the scattered wave vector and represents intensity in the area averaged diffraction pattern, while is the intensity in a single diffraction pattern from the SEND dataset. The interpretation of is made based on the separation of the fluctuating part of scattering potential () from the average scattering potential (). The scattering seen by a nanosized electron beam is thus

, S2

where varies with the electron probe position. Diffraction by gives the local diffraction pattern , while diffraction by gives . For example, a random alloy would yield .

The diffraction pattern can be separated into two parts under the approximations that electron diffuse scattering is weak (as observed in the HEA) and the wave function associated with diffuse scattering has a random phase, so that

, S3

where is the thickness averaged diffraction pattern. The convolution and thickness averaging reflect that there are many beams in , each contributes to the total electron diffuse scattering as the beam travels through the entire sample thickness13,14. Using

S4

Where . FT of then gives

. S5

Thus gives the Patterson function of the fluctuating scattering potential multiplied by a shape function, which is the FT of a top-hat function in a diffraction pattern where the transmitted beam is much stronger than the diffracted beams.

To efficiently visualize 10,000 patterns, we performed image clustering based on the histogram segmentation approach. **Extended Data** **Fig. 6a** shows the averaged . We then constructed a virtual ADF image from the dataset. The ADF image intensity here is associated with the magnitude of local distortions. The histogram of **Extended Data** **Fig. 6b** is shown in **Extended Data** **Fig. 6c**, which is colored accordingly, where we also normalized the maximum intensity to 1. Histogram segmentation was done by applying a lower and an upper threshold. For example, a “cluster” can be defined by a threshold of 0.7 to 1.0, the patterns with the ADF intensities falling within this range were categorized as the same cluster. **Extended Data** **Fig. 6d** shows the thresholded image, where the corresponding averaged in the masked region is shown in **Extended Data Fig. 6e**.

Using the above histogram segmentation approach, we classified the patterns into 5 clusters, the cluster averaged patterns are shown in **Extended Data** **Fig. 7b-f**, while the intensity range for each cluster is marked in **Extended Data** **Fig. 7a**. **Extended Data Table 1** summarizes the measurement results for the first and second nearest neighbor peaks from the cluster averaged patterns.

# 5. Interaction of Nanoscopic Shear with Dislocations

We performed post-mortem TEM analysis on the cross-sectioned and thinned nanopillars after compression to strain (** of 1 and 30% using the geometry illustrated in **Extended Data** **Fig. 8a**. The cross-section preparation was done by FIB using following procedures, initial thinning using ion beam energy of 30 keV and ion current of 7.7pA to ~100 nm thickness, followed by the ion beam of 5 keV and 5 pA to ~50 nm thickness, and finishing with the ion beam at 1 keV and 15 pA for surface polishing to reduce beam damage effects. The thinning of the deformed nanopillars was along the direction of a few degrees off []. In this way, the dislocation slip planes are partially preserved in the thin section. **Extended Data** **Fig. 8b** is a BF-TEM image of a thinned nanopillar, showing the dislocation band and pileups in a nanopillar, which were formed after compression to a strain of 30%. The image was taken near the [] zone axis.

**Extended Data** **Figs. 8c** and **d** examine nanoscopic shear in the back and front of the dislocation band that was formed during uniaxial compression. The nanoscopic shear appears as Moiré fringes in the TEM micrographs. Their presence is associated with a change in angle between two sets of lattice planes for reasons explained in **Fig. 4** of main text. Dislocation pileup is observed in front of the dislocation band. The local stress is highest in front of the dislocation pileup, while behind the dislocation band (**Extended Data** **Fig. 8c**), it represents the state after the passing of high stress field. For **Extended Data** **Fig. 8c**, the Moiré fringes are mostly parallel to the ***g***(111) direction, Moiré fringes aligned perpendicular to the ***g***(111) direction are also observed with a lower density. While in **Extended Data** **Fig. 8d** where the stress field is high, the Moiré fringes are mostly parallel to ***g***(111).

Extended Data Table 1. Distorted interatomic distances obtained from segmentation averageddCp patterns (Extended Data Fig. 7). The d’1A,B and d’2A,B as marked in **Fig. 2H** denote the first and second nearest neighbor distances in Å, and α and θ are angles of d’1A relative to the horizontal axis in Extended Data Fig. 7 and the angle between d’1Aand d’1B in degrees. The distances are measured based on the maximum peak intensity position.

| Range | d'1A | δ(%) | d'1B | δ(%) | d'2A | δ(%) | d'2B | δ(%) | α | θ | Weight |
| --- | --- | --- | --- | --- | --- | --- | --- | --- | --- | --- | --- |
| 0.0-0.32 | 1.81 | 1.06 | 1.81 | 1.06 | 2.46 | -2.93 | 2.39 | -5.69 | -3.58 | 90.6 | 11% |
| 0.32-0.5 | 1.85 | 2.95 | 1.85 | 3.01 | 2.49 | -1.75 | 2.49 | -1.75 | -2.7 | 89.9 | 52% |
| 0.4-0.5 | 1.85 | 2.95 | 1.85 | 3.01 | 2.49 | -1.75 | 2.49 | -1.75 | -2.95 | 90.1 | 24% |
| 0.5-0.6 | 1.85 | 2.95 | 1.85 | 3.01 | 2.6 | 2.46 | 2.49 | -1.75 | -3.78 | 90.4 | 9% |
| 0.6-0.7 | 1.85 | 2.95 | 1.81 | 1.06 | 2.66 | 4.75 | 2.53 | -0.26 | -4.4 | 91.7 | 3% |
| 0.7-1 | 1.79 | -0.5 | 1.78 | -0.89 | 2.66 | 4.87 | 2.49 | -1.75 | -6.52 | 92.6 | 1% |

# Suppl. References

1 Wang, W. R. *et al.* Effects of Al addition on the microstructure and mechanical property of AlxCoCrFeNi high-entropy alloys. *Intermetallics* **26**, 44-51, doi:10.1016/j.intermet.2012.03.005 (2012).

2 Chou, H.-P., Chang, Y.-S., Chen, S.-K. & Yeh, J.-W. Microstructure, thermophysical and electrical properties in AlxCoCrFeNi (0≤x≤2) high-entropy alloys. *Materials Science and Engineering: B* **163**, 184-189, doi:<https://doi.org/10.1016/j.mseb.2009.05.024> (2009).

3 Miracle, D. B. & Senkov, O. N. A critical review of high entropy alloys and related concepts. *Acta Materialia* **122**, 448-511, doi:10.1016/j.actamat.2016.08.081 (2017).

4 Yang, T. *et al.* Effects of AL addition on microstructure and mechanical properties of AlxCoCrFeNi High-entropy alloy. *Materials Science and Engineering: A* **648**, 15-22, doi:<https://doi.org/10.1016/j.msea.2015.09.034> (2015).

5 Zhang, C. & Gao, M. C. in *High-Entropy Alloys: Fundamentals and Applications* (eds Michael C. Gao, Jien-Wei Yeh, Peter K. Liaw, & Yong Zhang) 399-444 (Springer International Publishing, 2016).

6 Saal, J. E., Berglund, I. S., Sebastian, J. T., Liaw, P. K. & Olson, G. B. Equilibrium high entropy alloy phase stability from experiments and thermodynamic modeling. *Scripta Materialia* **146**, 5-8, doi:<https://doi.org/10.1016/j.scriptamat.2017.10.027> (2018).

7 Alagarsamy, K. *et al.* Mechanical Properties of High Entropy Alloy Al0.1CoCrFeNi for Peripheral Vascular Stent Application. *Cardiovascular Engineering and Technology* **7**, 448-454, doi:10.1007/s13239-016-0286-6 (2016).

8 Komarasamy, M., Kumar, N., Mishra, R. S. & Liaw, P. K. Anomalies in the deformation mechanism and kinetics of coarse-grained high entropy alloy. *Materials Science and Engineering: A* **654**, 256-263, doi:<https://doi.org/10.1016/j.msea.2015.12.063> (2016).

9 Spence, J. C. H. & Taftø, J. ALCHEMI: a new technique for locating atoms in small crystals. *Journal of Microscopy* **130**, 147-154, doi:10.1111/j.1365-2818.1983.tb04213.x (1983).

10 Lu, P., Romero, E., Lee, S., MacManus-Driscoll, J. L. & Jia, Q. Chemical Quantification of Atomic-Scale EDS Maps under Thin Specimen Conditions. *Microscopy and Microanalysis* **20**, 1782-1790, doi:10.1017/S1431927614013245 (2014).

11 Zuo, J.-M. in *Springer Handbook of Microscopy* (eds Peter W. Hawkes & John C. H. Spence) 2-2 (Springer International Publishing, 2019).

12 Shao, Y. T. *et al.* Cepstral Scanning Transmission Electron Microscopy Imaging of Severe Lattice Distortions. *Ultramicroscopy* **Submited** (2020).

13 Gjonnes, J. & Watanabe, D. Dynamical diffuse scattering from magnesium oxide single crystals. *Acta Crystallographica* **21**, 297-302, doi:doi:10.1107/S0365110X66002858 (1966).

14 Zuo, J. M. & Spence, J. C. H. *Advanced Transmission Electron Microscopy, Imaging and Diffraction in Nanoscience*. (Springer, 2017).
